# Supplementary material
Source: publisher figshare collection journal article supplement (https://gsajournals.figshare.com/ndownloader/files/16827770)
Supplement: Supplementary file 1 [file 16827770]

IndivID	seqID	Relationship	FatherGroup	MotherGroup
1	W_1	Progeny	A	B
2	W_2	Progeny	A	B
3	W_3	Progeny	A	B
4	W_4	Progeny	A	B
5	W_5	Progeny	A	B
6	W_6	Progeny	A	B
7	W_7	Progeny	A	B
8	W_8	Progeny	A	B
9	W_9	Progeny	A	B
10	R_10	Dam
11	W_11	Progeny	A	B
12	W_12	Progeny	A	B
13	R_13	Sire
14	R_14	Dam
15	R_15	Dam
16	R_16	Dam
17	R_17	Dam
18	R_18	Dam
19	R_19	Dam
20	R_20	Dam
21	R_21	Dam
22	R_22	Dam
23	R_23	Dam
24	R_24	Dam
25	W_25	Dam
26	R_26	Dam
27	R_27	Dam
28	R_28	Dam
29	R_29	Dam
30	R_30	Dam
31	R_31	Dam
32	R_32	Dam
33	R_33	Dam
34	R_34	Dam
35	R_35	Dam
36	W_36	Progeny	A	B
37	R_37	Dam
38	W_38	Progeny	A	B
39	W_39	Progeny	A	B
40	W_40	Progeny	A	B
41	R_41	Dam
42	R_42	Dam
43	W_43	Progeny	A	B
44	R_44	Dam
45	R_45	Dam
46	R_46	Dam
47	W_47	Progeny	A	B
48	R_48	Dam
49	R_49	Dam
50	R_50	Dam
51	R_51	Dam
52	R_52	Dam
53	R_53	Progeny	C	D
54	R_54	Progeny	C	D
55	R_55	Progeny	C	D
56	R_56	Progeny	C	D
57	R_57	Progeny	C	D
58	R_58	Progeny	C	D
59	R_59	Progeny	C	D
60	R_60	Progeny	C	D
61	R_61	Progeny	C	D
62	R_62	Progeny	C	D
63	W_63	Progeny	A	B
64	W_64	Progeny	A	B
65	W_65	Progeny	A	B
66	W_66	Progeny	A	B
67	W_67	Progeny	A	B
68	W_68	Progeny	A	B
69	W_69	Progeny	A	B
70	W_70	Progeny	A	B
71	W_71	Dam
72	R_72	Progeny	C	D
73	R_73	Progeny	C	D
74	R_74	Progeny	C	D
75	R_75	Progeny	C	D
76	R_76	Progeny	C	D
77	R_77	Progeny	C	D
78	R_78	Progeny	C	D
79	R_79	Progeny	C	D
80	R_80	Progeny	C	D
81	R_81	Progeny	C	D
82	R_82	Dam
83	W_83	Dam
84	R_84	Sire
85	W_85	Dam
86	R_86	Progeny	C	D
87	R_87	Progeny	C	D
88	R_88	Progeny	C	D
89	R_89	Progeny	C	D
90	R_90	Progeny	C	D
91	R_91	Progeny	C	D
92	R_92	Progeny	C	D
93	R_93	Progeny	C	D
94	R_94	Progeny	C	D
95	R_95	Progeny	C	D
96	R_96	Dam
97	R_97	Progeny	C	D
98	R_98	Progeny	C	D
99	R_99	Progeny	C	D
100	R_100	Progeny	C	D
101	R_101	Progeny	C	D
102	R_102	Progeny	C	D
103	R_103	Progeny	C	D
104	R_104	Progeny	C	D
105	R_105	Progeny	C	D
106	R_106	Progeny	C	D
107	W_107	Dam
108	R_108	Dam
109	W_109	Dam
110	W_110	Dam
111	W_111	Dam
112	W_112	Dam
113	W_113	Dam
114	W_114	Dam
115	W_115	Dam
116	W_116	Dam
117	W_117	Dam
118	W_118	Dam
119	W_119	Dam
120	W_120	Dam
121	R_121	Dam
122	R_122	Dam
123	R_123	Dam
124	R_124	Progeny	C	D
125	R_125	Dam
126	R_126	Progeny	C	D
127	R_127	Progeny	C	D
128	R_128	Progeny	C	D
129	R_129	Progeny	C	D
130	R_130	Progeny	C	D
131	R_131	Progeny	C	D
132	R_132	Progeny	C	D
133	R_133	Progeny	C	D
134	R_134	Progeny	C	D
135	R_135	Progeny	C	D
136	R_136	Progeny	C	D
137	R_137	Progeny	C	D
138	R_138	Progeny	C	D
139	R_139	Progeny	C	D
140	R_140	Progeny	C	D
141	R_141	Dam
142	W_142	Dam
143	W_143	Dam
144	R_144	Progeny	C	D
145	R_145	Progeny	C	D
146	R_146	Progeny	C	D
147	R_147	Progeny	C	D
148	R_148	Progeny	C	D
149	R_149	Progeny	C	D
150	R_150	Progeny	C	D
151	R_151	Progeny	C	D
152	R_152	Progeny	C	D
153	R_153	Progeny	C	D
154	W_154	Progeny	A	B
155	W_155	Progeny	A	B
156	W_156	Progeny	A	B
157	W_157	Progeny	A	B
158	W_158	Progeny	A	B
159	W_159	Progeny	A	B
160	W_160	Progeny	A	B
161	W_161	Progeny	A	B
162	W_162	Progeny	A	B
163	W_163	Progeny	A	B
164	R_164	Dam
165	W_165	Progeny	A	B
166	W_166	Progeny	A	B
167	W_167	Progeny	A	B
168	W_168	Progeny	A	B
169	W_169	Progeny	A	B
170	W_170	Progeny	A	B
171	W_171	Progeny	A	B
172	W_172	Dam
173	W_173	Dam
174	W_174	Dam
175	W_175	Dam
176	W_176	Dam
177	W_177	Dam
178	W_178	Dam
179	W_179	Dam
180	R_180	Dam
181	R_181	Dam
182	R_182	Dam
183	R_183	Dam
184	R_184	Dam
185	R_185	Dam
186	R_186	Dam
187	R_187	Dam
188	R_188	Dam
189	R_189	Dam
190	W_190	Dam
191	R_191	Dam
192	R_192	Dam
193	R_193	Dam
194	W_194	Dam
195	R_195	Dam
196	W_196	Dam
197	R_197	Dam
198	R_198	Dam
199	W_199	Dam
200	W_200	Dam
201	W_201	Dam
202	R_202	Dam
203	R_203	Dam
204	R_204	Dam
205	R_205	Dam
206	W_206	Dam
207	R_207	Dam
208	R_208	Dam
209	R_209	Dam
210	R_210	Dam
211	R_211	Dam
212	R_212	Dam
213	R_213	Dam
214	W_214	Progeny	A	B
215	W_215	Dam
216	W_216	Progeny	A	B
217	W_217	Progeny	A	B
218	W_218	Progeny	A	B
219	W_219	Progeny	A	B
220	W_220	Progeny	A	B
221	W_221	Progeny	A	B
222	W_222	Progeny	A	B
223	R_223	Dam
224	W_224	Dam
225	R_225	Dam
226	W_226	Dam
227	W_227	Dam
228	W_228	Dam
229	W_229	Dam
230	W_230	Dam
231	W_231	Dam
232	W_232	Dam
233	R_233	Dam
234	R_234	Dam
235	W_235	Dam
236	W_236	Dam
237	R_237	Dam
238	R_238	Dam
239	W_239	Dam
240	R_240	Progeny	C	D
241	R_241	Progeny	C	D
242	R_242	Progeny	C	D
243	R_243	Progeny	C	D
244	R_244	Progeny	C	D
245	R_245	Progeny	C	D
246	R_246	Progeny	C	D
247	R_247	Progeny	C	D
248	W_248	Progeny	A	B
249	R_249	Progeny	C	D
250	R_250	Progeny	C	D
251	R_251	Dam
252	W_252	Dam
253	W_253	Dam
254	R_254	Dam
255	R_255	Dam
256	R_256	Progeny	C	D
257	R_257	Progeny	C	D
258	R_258	Progeny	C	D
259	R_259	Progeny	C	D
260	R_260	Progeny	C	D
261	R_261	Progeny	C	D
262	R_262	Progeny	C	D
263	R_263	Progeny	C	D
264	R_264	Progeny	C	D
265	R_265	Progeny	C	D
266	R_266	Dam
267	R_267	Dam
268	R_268	Dam
269	R_269	Dam
270	W_270	Dam
271	R_271	Dam
272	R_272	Dam
273	R_273	Dam
274	R_274	Dam
275	R_275	Progeny	C	D
276	R_276	Progeny	C	D
277	R_277	Dam
278	R_278	Progeny	C	D
279	R_279	Progeny	C	D
280	R_280	Progeny	C	D
281	R_281	Progeny	C	D
282	R_282	Progeny	C	D
283	R_283	Progeny	C	D
284	R_284	Progeny	C	D
285	R_285	Progeny	C	D
286	W_286	Progeny	A	B
287	W_287	Progeny	A	B
288	W_288	Progeny	A	B
289	W_289	Progeny	A	B
290	W_290	Progeny	A	B
291	W_291	Progeny	A	B
292	W_292	Progeny	A	B
293	W_293	Progeny	A	B
294	W_294	Progeny	A	B
295	W_295	Progeny	A	B
296	W_296	Progeny	A	B
297	W_297	Progeny	A	B
298	W_298	Progeny	A	B
299	W_299	Progeny	A	B
300	W_300	Progeny	A	B
301	W_301	Progeny	A	B
302	W_302	Progeny	A	B
303	W_303	Progeny	A	B
304	W_304	Progeny	A	B
305	R_305	Dam
306	R_306	Dam
307	R_307	Dam
308	R_308	Dam
309	R_309	Dam
310	R_310	Dam
311	R_311	Dam
312	R_312	Dam
313	R_313	Dam
314	W_314	Dam
315	W_315	Dam
316	W_316	Dam
317	R_317	Dam
318	W_318	Dam
319	W_319	Dam
320	W_320	Dam
321	R_321	Progeny	C	D
322	R_322	Dam
323	R_323	Dam
324	R_324	Dam
325	R_325	Dam
326	R_326	Dam
327	R_327	Dam
328	R_328	Dam
329	R_329	Dam
330	R_330	Dam
331	R_331	Dam
332	R_332	Progeny	C	D
333	R_333	Dam
334	R_334	Dam
335	R_335	Dam
336	R_336	Dam
337	R_337	Dam
338	R_338	Dam
339	W_339	Dam
340	W_340	Dam
341	R_341	Dam
342	W_342	Dam
343	W_343	Dam
344	R_344	Dam
345	R_345	Progeny	C	D
346	W_346	Progeny	A	B
347	W_347	Progeny	A	B
348	W_348	Progeny	A	B
349	W_349	Progeny	A	B
350	W_350	Progeny	A	B
351	W_351	Progeny	A	B
352	W_352	Progeny	A	B
353	R_353	Dam
354	W_354	Progeny	A	B
355	W_355	Progeny	A	B
356	R_356	Dam
357	R_357	Dam
358	R_358	Dam
359	R_359	Dam
360	R_360	Dam
361	R_361	Dam
362	W_362	Dam
363	R_363	Dam
364	W_364	Progeny	A	B
365	W_365	Dam
366	W_366	Progeny	A	B
367	R_367	Dam
368	W_368	Sire
369	R_369	Dam
370	R_370	Dam
371	R_371	Dam
372	R_372	Dam
373	R_373	Dam
374	R_374	Dam
375	R_375	Progeny	C	D
376	R_376	Progeny	C	D
377	R_377	Progeny	C	D
378	R_378	Progeny	C	D
379	R_379	Progeny	C	D
380	R_380	Progeny	C	D
381	R_381	Progeny	C	D
382	W_382	Dam
383	R_383	Dam
384	W_384	Dam
385	W_385	Dam
386	R_386	Progeny	C	D
387	R_387	Progeny	C	D
388	R_388	Progeny	C	D
389	R_389	Progeny	C	D
390	R_390	Progeny	C	D
391	R_391	Progeny	C	D
392	R_392	Progeny	C	D
393	R_393	Progeny	C	D
394	R_394	Progeny	C	D
395	R_395	Dam
396	R_396	Dam
397	R_397	Dam
398	W_398	Dam
399	W_399	Sire
400	R_400	Progeny	C	D
401	R_401	Progeny	C	D
402	R_402	Progeny	C	D
403	R_403	Progeny	C	D
404	R_404	Progeny	C	D
405	R_405	Progeny	C	D
406	R_406	Progeny	C	D
407	R_407	Progeny	C	D
408	R_408	Dam
409	W_409	Dam
410	R_410	Dam
411	R_411	Dam
412	R_412	Dam
413	W_413	Dam
414	R_414	Progeny	C	D
415	R_415	Progeny	C	D
416	R_416	Progeny	C	D
417	R_417	Progeny	C	D
418	R_418	Progeny	C	D
419	R_419	Progeny	C	D
420	R_420	Progeny	C	D
421	R_421	Progeny	C	D
422	R_422	Progeny	C	D
423	R_423	Progeny	C	D
424	W_424	Progeny	A	B
425	W_425	Progeny	A	B
426	W_426	Progeny	A	B
427	W_427	Progeny	A	B
428	W_428	Progeny	A	B
429	W_429	Progeny	A	B
430	W_430	Progeny	A	B
431	W_431	Progeny	A	B
432	W_432	Progeny	A	B
433	R_433	Dam
434	W_434	Progeny	A	B
435	W_435	Progeny	A	B
436	W_436	Progeny	A	B
437	W_437	Progeny	A	B
438	W_438	Progeny	A	B
439	W_439	Progeny	A	B
440	W_440	Progeny	A	B
441	R_441	Dam
442	R_442	Dam
443	W_443	Progeny	A	B
444	W_444	Progeny	A	B
445	R_445	Dam
446	R_446	Dam
447	W_447	Dam
448	W_448	Dam
449	W_449	Dam
450	W_450	Dam
451	W_451	Dam
452	W_452	Dam
453	W_453	Dam
454	W_454	Dam
455	W_455	Dam
456	W_456	Dam
457	R_457	Dam
458	R_458	Dam
459	R_459	Dam
460	R_460	Dam
461	R_461	Dam
462	R_462	Dam
463	R_463	Dam
464	R_464	Dam
465	R_465	Dam
466	R_466	Dam
467	R_467	Dam
468	R_468	Dam
469	R_469	Dam
470	R_470	Dam
471	R_471	Dam
472	R_472	Dam
473	R_473	Dam
474	R_474	Dam
475	R_475	Dam
476	R_476	Dam
477	W_477	Dam
478	W_478	Dam
479	W_479	Dam
480	W_480	Dam
481	W_481	Dam
482	W_482	Dam
483	W_483	Dam
484	W_484	Dam
485	R_485	Dam
486	R_486	Dam
487	W_487	Progeny	A	B
488	W_488	Progeny	A	B
489	W_489	Progeny	A	B
490	W_490	Progeny	A	B
491	W_491	Progeny	A	B
492	W_492	Progeny	A	B
493	W_493	Progeny	A	B
494	W_494	Progeny	A	B
495	W_495	Progeny	A	B
496	W_496	Progeny	A	B
497	W_497	Dam
498	W_498	Dam
499	R_499	Dam
500	R_500	Dam
501	R_501	Dam
502	R_502	Dam
503	R_503	Dam
504	R_504	Dam
505	R_505	Dam
506	R_506	Sire
507	R_507	Sire
508	R_508	Dam
509	R_509	Dam
510	W_510	Sire
511	R_511	Dam
512	R_512	Progeny	C	D
513	R_513	Progeny	C	D
514	R_514	Progeny	C	D
515	R_515	Progeny	C	D
516	R_516	Progeny	C	D
517	R_517	Progeny	C	D
518	R_518	Progeny	C	D
519	R_519	Progeny	C	D
520	R_520	Progeny	C	D
521	R_521	Progeny	C	D
522	W_522	Dam
523	W_523	Dam
524	W_524	Dam
525	W_525	Dam
526	W_526	Dam
527	W_527	Dam
528	W_528	Dam
529	W_529	Dam
530	W_530	Dam
531	W_531	Dam
532	W_532	Dam
533	R_533	Dam
534	W_534	Dam
535	W_535	Dam
536	R_536	Dam
537	R_537	Progeny	C	D
538	R_538	Progeny	C	D
539	R_539	Progeny	C	D
540	R_540	Progeny	C	D
541	R_541	Progeny	C	D
542	R_542	Progeny	C	D
543	R_543	Progeny	C	D
544	R_544	Progeny	C	D
545	R_545	Progeny	C	D
546	R_546	Progeny	C	D
547	R_547	Progeny	C	D
548	R_548	Progeny	C	D
549	R_549	Progeny	C	D
550	R_550	Progeny	C	D
551	R_551	Progeny	C	D
552	R_552	Progeny	C	D
553	R_553	Progeny	C	D
554	R_554	Progeny	C	D
555	R_555	Progeny	C	D
556	R_556	Progeny	C	D
557	W_557	Dam
558	W_558	Dam
559	W_559	Dam
560	W_560	Dam
561	W_561	Dam
562	W_562	Dam
563	W_563	Dam
564	W_564	Dam
565	W_565	Dam
566	R_566	Progeny	C	D
567	R_567	Progeny	C	D
568	R_568	Progeny	C	D
569	R_569	Progeny	C	D
570	R_570	Progeny	C	D
571	R_571	Progeny	C	D
572	R_572	Progeny	C	D
573	R_573	Progeny	C	D
574	R_574	Progeny	C	D
575	R_575	Progeny	C	D
576	R_576	Dam
577	R_577	Dam
578	R_578	Dam
579	R_579	Progeny	C	D
580	R_580	Progeny	C	D
581	R_581	Progeny	C	D
582	R_582	Progeny	C	D
583	R_583	Progeny	C	D
584	R_584	Progeny	C	D
585	R_585	Progeny	C	D
586	R_586	Progeny	C	D
587	R_587	Dam
588	R_588	Progeny	C	D
589	R_589	Progeny	C	D
590	R_590	Dam
591	W_591	Progeny	A	B
592	W_592	Progeny	A	B
593	W_593	Progeny	A	B
594	W_594	Progeny	A	B
595	W_595	Progeny	A	B
596	W_596	Progeny	A	B
597	W_597	Progeny	A	B
598	W_598	Progeny	A	B
599	W_599	Progeny	A	B
600	R_600	Dam
601	R_601	Dam
602	R_602	Dam
603	R_603	Dam
604	R_604	Dam
605	R_605	Dam
606	R_606	Dam
607	R_607	Dam
608	R_608	Dam
609	R_609	Dam
610	R_610	Dam
611	W_611	Dam
612	W_612	Dam
613	W_613	Dam
614	W_614	Dam
615	W_615	Dam
616	W_616	Dam
617	R_617	Dam
618	R_618	Dam
619	R_619	Dam
620	W_620	Dam
621	W_621	Dam
622	R_622	Dam
623	R_623	Dam
624	R_624	Dam
625	R_625	Dam
626	R_626	Dam
627	R_627	Dam
628	R_628	Dam
629	R_629	Dam
630	W_630	Dam
631	W_631	Dam
632	W_632	Dam
633	W_633	Dam
634	W_634	Dam
635	W_635	Dam
636	W_636	Dam
637	R_637	Progeny	C	D
638	R_638	Dam
639	R_639	Dam
640	R_640	Dam
641	R_641	Dam
642	R_642	Dam
643	R_643	Dam
644	R_644	Dam
645	R_645	Progeny	C	D
646	R_646	Progeny	C	D
647	R_647	Progeny	C	D
648	R_648	Progeny	C	D
649	R_649	Progeny	C	D
650	R_650	Progeny	C	D
651	R_651	Progeny	C	D
652	R_652	Progeny	C	D
653	R_653	Dam
654	R_654	Progeny	C	D
655	R_655	Progeny	C	D
656	W_656	Dam
657	W_657	Dam
658	W_658	Dam
659	W_659	Dam
660	W_660	Dam
661	W_661	Dam
662	R_662	Progeny	C	D
663	R_663	Progeny	C	D
664	R_664	Progeny	C	D
665	R_665	Progeny	C	D
666	R_666	Progeny	C	D
667	R_667	Progeny	C	D
668	R_668	Progeny	C	D
669	R_669	Progeny	C	D
670	R_670	Progeny	C	D
671	R_671	Progeny	C	D
672	R_672	Progeny	C	D
673	R_673	Progeny	C	D
674	R_674	Progeny	C	D
675	R_675	Progeny	C	D
676	R_676	Progeny	C	D
677	R_677	Progeny	C	D
678	R_678	Progeny	C	D
679	R_679	Sire
680	R_680	Sire
681	R_681	Sire
682	R_682	Sire
683	R_683	Sire
684	R_684	Sire
685	W_685	Progeny	A	B
686	W_686	Dam
687	W_687	Dam
688	W_688	Dam
689	W_689	Dam
690	W_690	Dam
691	W_691	Dam
692	W_692	Dam
693	W_693	Dam
694	W_694	Dam
695	W_695	Dam
696	W_696	Dam
697	W_697	Dam
698	R_698	Progeny	C	D
699	R_699	Progeny	C	D
700	R_700	Progeny	C	D
701	R_701	Progeny	C	D
702	R_702	Progeny	C	D
703	R_703	Progeny	C	D
704	R_704	Progeny	C	D
705	R_705	Progeny	C	D
706	R_706	Progeny	C	D
707	R_707	Progeny	C	D
708	R_708	Dam
709	R_709	Progeny	C	D
710	R_710	Progeny	C	D
711	R_711	Progeny	C	D
712	R_712	Progeny	C	D
713	R_713	Progeny	C	D
714	R_714	Progeny	C	D
715	R_715	Progeny	C	D
716	R_716	Progeny	C	D
717	R_717	Progeny	C	D
718	R_718	Progeny	C	D
719	W_719	Dam
720	W_720	Progeny	A	B
721	W_721	Progeny	A	B
722	W_722	Progeny	A	B
723	W_723	Progeny	A	B
724	W_724	Progeny	A	B
725	W_725	Progeny	A	B
726	W_726	Progeny	A	B
727	W_727	Progeny	A	B
728	W_728	Progeny	A	B
729	W_729	Dam
730	R_730	Dam
731	R_731	Dam
732	R_732	Dam
733	R_733	Dam
734	R_734	Dam
735	R_735	Dam
736	R_736	Dam
737	R_737	Dam
738	R_738	Dam
739	W_739	Dam
740	R_740	Dam
741	R_741	Dam
742	R_742	Dam
743	R_743	Dam
744	R_744	Dam
745	R_745	Dam
746	R_746	Dam
747	R_747	Dam
748	R_748	Dam
749	R_749	Dam
750	R_750	Dam
751	R_751	Dam
752	R_752	Dam
753	R_753	Dam
754	R_754	Dam
755	R_755	Dam
756	R_756	Dam
757	R_757	Dam
758	R_758	Dam
759	R_759	Dam
760	R_760	Dam
761	R_761	Dam
762	R_762	Dam
763	R_763	Dam
764	R_764	Dam
765	R_765	Dam
766	R_766	Dam
767	R_767	Dam
768	R_768	Dam
769	R_769	Dam
770	R_770	Dam
771	R_771	Dam
772	W_772	Dam
773	R_773	Dam
774	R_774	Dam
775	W_775	Dam
776	R_776	Dam
777	R_777	Dam
778	R_778	Dam
779	R_779	Dam
780	R_780	Dam
781	W_781	Progeny	A	B
782	R_782	Dam
783	R_783	Dam
784	W_784	Dam
785	R_785	Dam
786	W_786	Progeny	A	B
787	R_787	Progeny	C	D
788	R_788	Progeny	C	D
789	R_789	Progeny	C	D
790	R_790	Progeny	C	D
791	R_791	Progeny	C	D
792	R_792	Progeny	C	D
793	R_793	Progeny	C	D
794	R_794	Progeny	C	D
795	R_795	Dam
796	R_796	Dam
797	R_797	Dam
798	R_798	Dam
799	R_799	Dam
800	R_800	Dam
801	R_801	Dam
802	R_802	Dam
803	W_803	Dam
804	W_804	Dam
805	W_805	Dam
806	W_806	Dam
807	W_807	Dam
808	W_808	Dam
809	W_809	Dam
810	W_810	Dam
811	R_811	Progeny	C	D
812	R_812	Progeny	C	D
813	W_813	Dam
814	R_814	Progeny	C	D
815	R_815	Progeny	C	D
816	R_816	Progeny	C	D
817	R_817	Progeny	C	D
818	R_818	Progeny	C	D
819	R_819	Progeny	C	D
820	R_820	Progeny	C	D
821	R_821	Dam
822	W_822	Sire
823	W_823	Sire
824	W_824	Dam
825	W_825	Dam
826	W_826	Dam
827	W_827	Dam
828	W_828	Dam
829	W_829	Dam
830	W_830	Dam
831	W_831	Dam
832	W_832	Dam
833	W_833	Dam
834	W_834	Dam
835	W_835	Dam
836	W_836	Dam
837	W_837	Dam
838	W_838	Dam
839	W_839	Dam
840	W_840	Progeny	A	B
841	W_841	Progeny	A	B
842	W_842	Dam
843	W_843	Progeny	A	B
844	W_844	Progeny	A	B
845	W_845	Progeny	A	B
846	W_846	Progeny	A	B
847	W_847	Progeny	A	B
848	W_848	Progeny	A	B
849	W_849	Progeny	A	B
850	W_850	Progeny	A	B
851	R_851	Progeny	C	D
852	R_852	Progeny	C	D
853	R_853	Progeny	C	D
854	R_854	Progeny	C	D
855	R_855	Progeny	C	D
856	R_856	Progeny	C	D
857	W_857	Progeny	A	B
858	W_858	Progeny	A	B
859	W_859	Progeny	A	B
860	W_860	Progeny	A	B
861	W_861	Dam
862	W_862	Dam
863	W_863	Dam
864	W_864	Dam
865	W_865	Dam
866	W_866	Dam
867	W_867	Progeny	A	B
868	W_868	Progeny	A	B
869	R_869	Dam
870	R_870	Dam
871	R_871	Dam
872	R_872	Dam
873	R_873	Dam
874	R_874	Dam
875	R_875	Dam
876	R_876	Dam
877	R_877	Dam
878	R_878	Dam
879	R_879	Dam
880	R_880	Dam
881	R_881	Dam
882	R_882	Dam
883	W_883	Dam
884	R_884	Dam
885	W_885	Dam
886	W_886	Dam
887	R_887	Dam
888	R_888	Dam
889	R_889	Dam
890	R_890	Dam
891	R_891	Dam
892	R_892	Dam
893	R_893	Dam
894	R_894	Dam
895	R_895	Dam
896	R_896	Dam
897	R_897	Dam
898	R_898	Dam
899	R_899	Dam
900	R_900	Dam
901	R_901	Dam
902	R_902	Dam
903	R_903	Dam
904	R_904	Dam
905	R_905	Dam
906	R_906	Dam
907	R_907	Dam
908	R_908	Dam
909	R_909	Dam
910	R_910	Dam
911	R_911	Dam
912	W_912	Dam
913	R_913	Dam
914	R_914	Progeny	C	D
915	R_915	Progeny	C	D
916	R_916	Progeny	C	D
917	R_917	Progeny	C	D
918	R_918	Progeny	C	D
919	R_919	Progeny	C	D
920	R_920	Progeny	C	D
921	R_921	Progeny	C	D
922	R_922	Progeny	C	D
923	R_923	Progeny	C	D
924	W_924	Dam
925	W_925	Dam
926	W_926	Dam
927	W_927	Dam
928	W_928	Dam
929	W_929	Dam
930	W_930	Dam
931	W_931	Dam
932	W_932	Dam
933	R_933	Progeny	C	D
934	R_934	Progeny	C	D
935	R_935	Progeny	C	D
936	R_936	Progeny	C	D
937	R_937	Progeny	C	D
938	R_938	Progeny	C	D
939	R_939	Progeny	C	D
940	R_940	Progeny	C	D
941	R_941	Progeny	C	D
942	R_942	Progeny	C	D
943	W_943	Dam
944	W_944	Dam
945	W_945	Dam
946	W_946	Dam
947	W_947	Dam
948	W_948	Dam
949	W_949	Dam
950	W_950	Dam
951	W_951	Dam
952	R_952	Dam
953	R_953	Dam
954	R_954	Sire
955	R_955	Sire
956	R_956	Sire
957	R_957	Sire
958	R_958	Sire
959	R_959	Sire
960	R_960	Sire
961	R_961	Sire
962	R_962	Sire
963	R_963	Dam
964	W_964	Progeny	A	B
965	W_965	Progeny	A	B
966	R_966	Dam
967	W_967	Progeny	A	B
968	W_968	Progeny	A	B
969	W_969	Progeny	A	B
970	W_970	Progeny	A	B
971	W_971	Progeny	A	B
972	W_972	Progeny	A	B
973	W_973	Progeny	A	B
974	W_974	Dam
975	W_975	Progeny	A	B
976	W_976	Progeny	A	B
977	W_977	Progeny	A	B
978	W_978	Progeny	A	B
979	W_979	Progeny	A	B
980	W_980	Progeny	A	B
981	W_981	Progeny	A	B
982	W_982	Progeny	A	B
983	R_983	Dam
984	R_984	Dam
985	R_985	Dam
986	R_986	Dam
987	R_987	Dam
988	R_988	Dam
989	R_989	Dam
990	R_990	Dam
991	R_991	Dam
992	R_992	Dam
993	R_993	Dam
994	R_994	Dam
995	R_995	Dam
996	R_996	Dam
997	R_997	Dam
998	R_998	Dam
999	W_999	Dam
1000	W_1000	Dam
1001	R_1001	Dam
1002	W_1002	Dam
1003	W_1003	Dam
1004	W_1004	Dam
1005	W_1005	Dam
1006	R_1006	Dam
1007	R_1007	Dam
1008	R_1008	Dam
1009	R_1009	Dam
1010	W_1010	Dam
1011	W_1011	Dam
1012	W_1012	Dam
1013	R_1013	Dam
1014	R_1014	Dam
1015	R_1015	Dam
1016	R_1016	Dam
1017	R_1017	Dam
1018	W_1018	Dam
1019	R_1019	Dam
1020	W_1020	Dam
1021	R_1021	Dam
1022	R_1022	Dam
1023	R_1023	Dam
1024	W_1024	Dam
1025	R_1025	Dam
1026	R_1026	Dam
1027	R_1027	Dam
1028	R_1028	Dam
1029	R_1029	Dam
1030	R_1030	Dam
1031	R_1031	Dam
1032	R_1032	Progeny	C	D
1033	R_1033	Progeny	C	D
1034	W_1034	Dam
1035	R_1035	Progeny	C	D
1036	R_1036	Progeny	C	D
1037	R_1037	Progeny	C	D
1038	R_1038	Progeny	C	D
1039	R_1039	Progeny	C	D
1040	R_1040	Progeny	C	D
1041	R_1041	Progeny	C	D
1042	R_1042	Progeny	C	D
1043	R_1043	Dam
1044	R_1044	Progeny	C	D
1045	W_1045	Dam
1046	W_1046	Dam
1047	W_1047	Dam
1048	R_1048	Progeny	C	D
1049	R_1049	Dam
1050	R_1050	Progeny	C	D
1051	R_1051	Progeny	C	D
1052	R_1052	Progeny	C	D
1053	R_1053	Progeny	C	D
1054	R_1054	Progeny	C	D
1055	R_1055	Progeny	C	D
1056	R_1056	Progeny	C	D
1057	R_1057	Progeny	C	D
1058	R_1058	Progeny	C	D
1059	R_1059	Progeny	C	D
1060	R_1060	Dam
1061	R_1061	Progeny	C	D
1062	W_1062	Dam
1063	W_1063	Dam
1064	R_1064	Progeny	C	D
1065	W_1065	Sire
1066	W_1066	Sire
1067	W_1067	Dam
1068	W_1068	Dam
1069	W_1069	Dam
1070	W_1070	Sire
1071	W_1071	Sire
1072	W_1072	Dam
1073	R_1073	Dam
1074	R_1074	Dam
1075	R_1075	Dam
1076	R_1076	Dam
1077	R_1077	Progeny	C	D
1078	R_1078	Progeny	C	D
1079	R_1079	Progeny	C	D
1080	R_1080	Progeny	C	D
1081	R_1081	Progeny	C	D
1082	R_1082	Progeny	C	D
1083	R_1083	Progeny	C	D
1084	R_1084	Progeny	C	D
1085	R_1085	Progeny	C	D
1086	R_1086	Progeny	C	D
1087	R_1087	Dam
1088	R_1088	Progeny	C	D
1089	R_1089	Progeny	C	D
1090	W_1090	Dam
1091	W_1091	Dam
1092	W_1092	Dam
1093	R_1093	Dam
1094	W_1094	Dam
1095	W_1095	Dam
1096	W_1096	Dam
1097	W_1097	Sire
1098	R_1098	Sire
1099	R_1099	Sire
1100	R_1100	Sire
1101	R_1101	Sire
1102	R_1102	Sire
1103	R_1103	Dam
1104	R_1104	Sire
1105	R_1105	Sire
1106	R_1106	Sire
1107	R_1107	Sire
1108	W_1108	Progeny	A	B
1109	W_1109	Progeny	A	B
1110	W_1110	Progeny	A	B
1111	W_1111	Progeny	A	B
1112	W_1112	Progeny	A	B
1113	W_1113	Progeny	A	B
1114	R_1114	Dam
1115	R_1115	Sire
1116	R_1116	Dam
1117	R_1117	Dam
1118	R_1118	Dam
1119	R_1119	Dam
1120	R_1120	Dam
1121	R_1121	Dam
1122	R_1122	Dam
1123	R_1123	Dam
1124	R_1124	Dam
1125	R_1125	Dam
1126	R_1126	Dam
1127	R_1127	Dam
1128	R_1128	Dam
1129	R_1129	Dam
1130	R_1130	Dam
1131	W_1131	Dam
1132	W_1132	Dam
1133	W_1133	Dam
1134	W_1134	Dam
1135	W_1135	Dam
1136	R_1136	Dam
1137	W_1137	Dam
1138	R_1138	Dam
1139	R_1139	Dam
1140	R_1140	Dam
1141	R_1141	Dam
1142	R_1142	Dam
1143	R_1143	Dam
1144	W_1144	Dam
1145	W_1145	Dam
1146	W_1146	Dam
1147	W_1147	Dam
1148	W_1148	Dam
1149	R_1149	Dam
1150	R_1150	Dam
1151	R_1151	Dam
1152	R_1152	Dam
1153	R_1153	Dam
1154	R_1154	Dam
1155	R_1155	Dam
1156	R_1156	Dam
1157	R_1157	Dam
1158	W_1158	Dam
1159	W_1159	Dam
1160	W_1160	Sire
1161	W_1161	Sire
1162	W_1162	Sire
1163	W_1163	Sire
1164	W_1164	Sire
1165	R_1165	Progeny	C	D
1166	W_1166	Progeny	A	B
1167	R_1167	Dam
1168	R_1168	Dam
1169	R_1169	Progeny	C	D
1170	R_1170	Dam
1171	R_1171	Dam
1172	R_1172	Dam
1173	R_1173	Dam
1174	R_1174	Dam
1175	R_1175	Dam
1176	R_1176	Dam
1177	R_1177	Dam
1178	R_1178	Progeny	C	D
1179	W_1179	Sire
1180	R_1180	Progeny	C	D
1181	R_1181	Progeny	C	D
1182	R_1182	Progeny	C	D
1183	R_1183	Progeny	C	D
1184	R_1184	Progeny	C	D
1185	R_1185	Progeny	C	D
1186	R_1186	Progeny	C	D
1187	R_1187	Progeny	C	D
1188	R_1188	Progeny	C	D
1189	R_1189	Progeny	C	D
1190	R_1190	Dam
1191	R_1191	Dam
1192	R_1192	Dam
1193	W_1193	Dam
1194	W_1194	Dam
1195	W_1195	Dam
1196	W_1196	Dam
1197	W_1197	Dam
1198	W_1198	Dam
1199	W_1199	Dam
1200	W_1200	Dam
1201	R_1201	Dam
1202	R_1202	Dam
1203	R_1203	Dam
1204	R_1204	Dam
1205	R_1205	Dam
1206	R_1206	Dam
1207	R_1207	Dam
1208	R_1208	Progeny	C	D
1209	R_1209	Progeny	C	D
1210	R_1210	Progeny	C	D
1211	R_1211	Progeny	C	D
1212	R_1212	Progeny	C	D
1213	R_1213	Progeny	C	D
1214	R_1214	Progeny	C	D
1215	R_1215	Progeny	C	D
1216	R_1216	Dam
1217	R_1217	Progeny	C	D
1218	R_1218	Progeny	C	D
1219	R_1219	Dam
1220	R_1220	Dam
1221	W_1221	Dam
1222	R_1222	Dam
1223	R_1223	Dam
1224	W_1224	Sire
1225	W_1225	Sire
1226	W_1226	Dam
1227	W_1227	Dam
1228	W_1228	Dam
1229	W_1229	Dam
1230	W_1230	Sire
1231	W_1231	Sire
1232	W_1232	Dam
1233	W_1233	Dam
1234	W_1234	Dam
1235	W_1235	Dam
1236	R_1236	Dam
1237	R_1237	Dam
1238	R_1238	Progeny	C	D
1239	R_1239	Progeny	C	D
1240	R_1240	Progeny	C	D
1241	R_1241	Progeny	C	D
1242	R_1242	Progeny	C	D
1243	R_1243	Progeny	C	D
1244	R_1244	Progeny	C	D
1245	R_1245	Progeny	C	D
1246	R_1246	Progeny	C	D
1247	R_1247	Progeny	C	D
1248	R_1248	Progeny	C	D
1249	R_1249	Progeny	C	D
1250	R_1250	Progeny	C	D
1251	R_1251	Progeny	C	D
1252	R_1252	Progeny	C	D
1253	R_1253	Progeny	C	D
1254	R_1254	Progeny	C	D
1255	R_1255	Progeny	C	D
1256	R_1256	Progeny	C	D
1257	R_1257	Progeny	C	D
1258	R_1258	Dam
1259	W_1259	Dam
1260	R_1260	Dam
1261	W_1261	Dam
1262	W_1262	Dam
1263	W_1263	Dam
1264	W_1264	Dam
1265	W_1265	Dam
1266	W_1266	Dam
1267	W_1267	Dam
1268	W_1268	Dam
1269	W_1269	Dam
1270	W_1270	Dam
1271	R_1271	Sire
1272	R_1272	Sire
1273	R_1273	Dam
1274	R_1274	Sire
1275	W_1275	Progeny	A	B
1276	W_1276	Progeny	A	B
1277	W_1277	Progeny	A	B
1278	W_1278	Progeny	A	B
1279	W_1279	Progeny	A	B
1280	W_1280	Progeny	A	B
1281	R_1281	Dam
1282	R_1282	Dam
1283	R_1283	Dam
1284	R_1284	Dam
1285	R_1285	Dam
1286	R_1286	Dam
1287	R_1287	Dam
1288	R_1288	Dam
1289	R_1289	Dam
1290	R_1290	Dam
1291	R_1291	Progeny	C	D
1292	R_1292	Dam
1293	R_1293	Dam
1294	R_1294	Dam
1295	R_1295	Dam
1296	R_1296	Dam
1297	R_1297	Dam
1298	R_1298	Dam
1299	R_1299	Dam
1300	R_1300	Dam
1301	R_1301	Dam
1302	R_1302	Dam
1303	R_1303	Dam
1304	R_1304	Dam
1305	R_1305	Dam
1306	R_1306	Dam
1307	R_1307	Dam
1308	R_1308	Dam
1309	R_1309	Dam
1310	W_1310	Dam
1311	W_1311	Dam
1312	R_1312	Dam
1313	R_1313	Dam
1314	W_1314	Dam
1315	R_1315	Dam
1316	R_1316	Dam
1317	R_1317	Dam
1318	R_1318	Dam
1319	R_1319	Dam
1320	R_1320	Dam
1321	R_1321	Dam
1322	W_1322	Dam
1323	R_1323	Dam
1324	R_1324	Dam
1325	R_1325	Dam
1326	R_1326	Dam
1327	R_1327	Dam
1328	R_1328	Dam
1329	W_1329	Dam
1330	W_1330	Dam
1331	R_1331	Dam
1332	R_1332	Dam
1333	R_1333	Progeny	C	D
1334	R_1334	Progeny	C	D
1335	R_1335	Progeny	C	D
1336	R_1336	Progeny	C	D
1337	R_1337	Progeny	C	D
1338	R_1338	Progeny	C	D
1339	R_1339	Progeny	C	D
1340	R_1340	Progeny	C	D
1341	R_1341	Progeny	C	D
1342	W_1342	Dam
1343	W_1343	Dam
1344	W_1344	Dam
1345	W_1345	Dam
1346	W_1346	Dam
1347	W_1347	Dam
1348	W_1348	Dam
1349	W_1349	Dam
1350	W_1350	Dam
1351	W_1351	Dam
1352	R_1352	Progeny	C	D
1353	R_1353	Dam
1354	R_1354	Dam
1355	W_1355	Dam
1356	R_1356	Dam
1357	R_1357	Progeny	C	D
1358	R_1358	Progeny	C	D
1359	R_1359	Progeny	C	D
1360	R_1360	Progeny	C	D
1361	R_1361	Progeny	C	D
1362	R_1362	Progeny	C	D
1363	R_1363	Progeny	C	D
1364	R_1364	Progeny	C	D
1365	R_1365	Progeny	C	D
1366	R_1366	Progeny	C	D
1367	R_1367	Progeny	C	D
1368	R_1368	Progeny	C	D
1369	R_1369	Dam
1370	R_1370	Progeny	C	D
1371	R_1371	Progeny	C	D
1372	R_1372	Progeny	C	D
1373	R_1373	Progeny	C	D
1374	R_1374	Progeny	C	D
1375	R_1375	Progeny	C	D
1376	R_1376	Progeny	C	D
1377	R_1377	Progeny	C	D
1378	R_1378	Dam
1379	W_1379	Dam
1380	W_1380	Dam
1381	W_1381	Dam
1382	W_1382	Dam
1383	W_1383	Dam
1384	W_1384	Dam
1385	W_1385	Dam
1386	W_1386	Dam
1387	W_1387	Dam
1388	W_1388	Dam
1389	W_1389	Dam
1390	R_1390	Progeny	C	D
1391	R_1391	Progeny	C	D
1392	R_1392	Progeny	C	D
1393	R_1393	Progeny	C	D
1394	R_1394	Progeny	C	D
1395	R_1395	Progeny	C	D
1396	R_1396	Progeny	C	D
1397	R_1397	Progeny	C	D
1398	R_1398	Progeny	C	D
1399	R_1399	Progeny	C	D
1400	R_1400	Progeny	C	D
1401	R_1401	Progeny	C	D
1402	R_1402	Progeny	C	D
1403	R_1403	Progeny	C	D
1404	R_1404	Progeny	C	D
1405	R_1405	Progeny	C	D
1406	R_1406	Progeny	C	D
1407	R_1407	Progeny	C	D
1408	W_1408	Dam
1409	R_1409	Progeny	C	D
1410	R_1410	Progeny	C	D
1411	W_1411	Dam
1412	W_1412	Dam
1413	W_1413	Dam
1414	W_1414	Dam
1415	W_1415	Dam
1416	W_1416	Dam
1417	W_1417	Dam
1418	W_1418	Dam
1419	R_1419	Dam
1420	W_1420	Dam
1421	W_1421	Dam
1422	W_1422	Progeny	A	B
1423	R_1423	Dam
1424	R_1424	Sire
1425	R_1425	Sire
1426	R_1426	Dam
1427	R_1427	Dam
1428	R_1428	Dam
1429	W_1429	Sire
1430	W_1430	Sire
1431	R_1431	Dam
1432	R_1432	Dam
1433	R_1433	Dam
1434	R_1434	Dam
1435	R_1435	Dam
1436	R_1436	Dam
1437	R_1437	Dam
1438	R_1438	Dam
1439	R_1439	Dam
1440	R_1440	Dam
1441	R_1441	Dam
1442	W_1442	Progeny	A	B
1443	W_1443	Progeny	A	B
1444	W_1444	Progeny	A	B
1445	W_1445	Progeny	A	B
1446	W_1446	Progeny	A	B
1447	W_1447	Progeny	A	B
1448	W_1448	Progeny	A	B
1449	W_1449	Dam
1450	W_1450	Dam
1451	R_1451	Dam
1452	R_1452	Dam
1453	R_1453	Dam
1454	R_1454	Dam
1456	R_1456	Dam
1457	R_1457	Dam
1458	R_1458	Dam
1459	R_1459	Dam
1460	R_1460	Dam
1461	W_1461	Dam
1462	W_1462	Dam
1463	W_1463	Dam
1464	W_1464	Dam
1465	R_1465	Dam
1466	R_1466	Dam
1467	W_1467	Dam
1468	W_1468	Dam
1469	R_1469	Dam
1470	R_1470	Dam
1471	R_1471	Dam
1472	R_1472	Dam
1473	R_1473	Dam
1474	R_1474	Dam
1475	R_1475	Dam
1476	R_1476	Dam
1477	R_1477	Dam
1478	R_1478	Dam
1479	R_1479	Dam
1480	R_1480	Dam
1481	R_1481	Dam
1482	R_1482	Dam
1483	R_1483	Dam
1484	R_1484	Dam
1485	W_1485	Dam
1486	W_1486	Dam
1487	R_1487	Dam
1488	R_1488	Dam
1489	W_1489	Progeny	A	B
1490	W_1490	Progeny	A	B
1491	W_1491	Progeny	A	B
1492	W_1492	Dam
1493	W_1493	Progeny	A	B
1494	W_1494	Progeny	A	B
1495	W_1495	Progeny	A	B
1496	R_1496	Progeny	C	D
1497	R_1497	Progeny	C	D
1498	R_1498	Progeny	C	D
1499	R_1499	Progeny	C	D
1500	R_1500	Progeny	C	D
1501	R_1501	Progeny	C	D
1502	R_1502	Progeny	C	D
1503	R_1503	Progeny	C	D
1504	R_1504	Progeny	C	D
1505	R_1505	Progeny	C	D
1506	W_1506	Dam
1507	W_1507	Dam
1508	W_1508	Dam
1509	R_1509	Dam
1510	R_1510	Dam
1511	R_1511	Dam
1512	R_1512	Progeny	C	D
1513	R_1513	Progeny	C	D
1514	R_1514	Progeny	C	D
1515	R_1515	Progeny	C	D
1516	R_1516	Progeny	C	D
1517	R_1517	Progeny	C	D
1518	R_1518	Progeny	C	D
1519	R_1519	Progeny	C	D
1520	R_1520	Progeny	C	D
1521	R_1521	Progeny	C	D
1522	R_1522	Progeny	C	D
1523	R_1523	Progeny	C	D
1524	R_1524	Progeny	C	D
1525	R_1525	Progeny	C	D
1526	R_1526	Progeny	C	D
1527	R_1527	Progeny	C	D
1528	R_1528	Progeny	C	D
1529	R_1529	Progeny	C	D
1530	R_1530	Progeny	C	D
1531	W_1531	Dam
1532	W_1532	Dam
1533	W_1533	Dam
1534	W_1534	Dam
1535	W_1535	Dam
1536	W_1536	Dam
1537	R_1537	Dam
1538	W_1538	Dam
1539	R_1539	Dam
1540	R_1540	Dam
1541	R_1541	Dam
1542	R_1542	Progeny	C	D
1543	R_1543	Progeny	C	D
1544	R_1544	Progeny	C	D
1545	R_1545	Progeny	C	D
1546	R_1546	Progeny	C	D
1547	R_1547	Progeny	C	D
1548	R_1548	Progeny	C	D
1549	R_1549	Progeny	C	D
1550	R_1550	Progeny	C	D
1551	R_1551	Progeny	C	D
1552	R_1552	Dam
1553	R_1553	Dam
1554	W_1554	Dam
1555	W_1555	Dam
1556	W_1556	Dam
1557	W_1557	Dam
1558	W_1558	Dam
1559	W_1559	Dam
1560	W_1560	Dam
1561	W_1561	Dam
1562	W_1562	Dam
1563	W_1563	Dam
1564	R_1564	Dam
1565	W_1565	Sire
1566	W_1566	Sire
1567	W_1567	Sire
1568	W_1568	Sire
1569	W_1569	Sire
1570	W_1570	Sire
1571	W_1571	Sire
1572	W_1572	Sire
1573	W_1573	Sire
1574	W_1574	Sire
1575	W_1575	Dam
1576	R_1576	Progeny	C	D
1577	R_1577	Progeny	C	D
1578	R_1578	Progeny	C	D
1579	R_1579	Progeny	C	D
1580	R_1580	Progeny	C	D
1581	R_1581	Progeny	C	D
1582	R_1582	Progeny	C	D
1583	R_1583	Progeny	C	D
1584	R_1584	Progeny	C	D
1585	R_1585	Dam
1586	R_1586	Dam
1587	R_1587	Dam
1588	R_1588	Dam
1589	R_1589	Dam
1590	R_1590	Dam
1591	R_1591	Dam
1592	R_1592	Dam
1593	R_1593	Dam
1594	W_1594	Progeny	A	B
1595	W_1595	Progeny	A	B
1596	W_1596	Progeny	A	B
1597	W_1597	Progeny	A	B
1598	W_1598	Progeny	A	B
1599	W_1599	Progeny	A	B
1600	W_1600	Progeny	A	B
1601	W_1601	Progeny	A	B
1602	W_1602	Progeny	A	B
1603	W_1603	Progeny	A	B
1604	R_1604	Dam
1605	R_1605	Dam
1606	R_1606	Dam
1607	R_1607	Dam
1608	W_1608	Dam
1609	W_1609	Dam
1610	W_1610	Dam
1611	W_1611	Dam
1612	W_1612	Dam
1613	W_1613	Dam
1614	W_1614	Dam
1615	W_1615	Dam
1616	W_1616	Dam
1617	W_1617	Dam
1618	W_1618	Dam
1619	W_1619	Dam
1620	W_1620	Dam
1621	R_1621	Dam
1622	R_1622	Dam
1623	R_1623	Dam
1624	R_1624	Dam
1625	R_1625	Dam
1626	W_1626	Progeny	A	B
1627	W_1627	Progeny	A	B
1628	W_1628	Progeny	A	B
1629	W_1629	Progeny	A	B
1630	W_1630	Progeny	A	B
1631	W_1631	Progeny	A	B
1632	W_1632	Progeny	A	B
1633	W_1633	Progeny	A	B
1634	W_1634	Progeny	A	B
1635	R_1635	Dam
1636	R_1636	Dam
1637	R_1637	Dam
1638	R_1638	Dam
1639	R_1639	Dam
1640	R_1640	Dam
1641	R_1641	Dam
1642	R_1642	Dam
1643	R_1643	Dam
1644	R_1644	Dam
1645	R_1645	Dam
1646	R_1646	Dam
1647	R_1647	Dam
1648	W_1648	Progeny	A	B
1649	R_1649	Dam
1650	R_1650	Dam
1651	R_1651	Progeny	C	D
1652	R_1652	Progeny	C	D
1653	R_1653	Progeny	C	D
1654	R_1654	Progeny	C	D
1655	R_1655	Progeny	C	D
1656	R_1656	Progeny	C	D
1657	R_1657	Progeny	C	D
1658	R_1658	Progeny	C	D
1659	R_1659	Progeny	C	D
1660	R_1660	Progeny	C	D
1661	R_1661	Progeny	C	D
1662	W_1662	Dam
1663	W_1663	Dam
1664	W_1664	Dam
1665	W_1665	Dam
1666	W_1666	Dam
1667	W_1667	Dam
1668	W_1668	Dam
1669	W_1669	Dam
1670	R_1670	Progeny	C	D
1671	R_1671	Progeny	C	D
1672	W_1672	Sire
1673	W_1673	Sire
1674	W_1674	Sire
1675	W_1675	Sire
1676	W_1676	Sire
1677	W_1677	Sire
1678	W_1678	Sire
1679	W_1679	Sire
1680	W_1680	Sire
1681	R_1681	Dam
1682	R_1682	Progeny	C	D
1683	R_1683	Progeny	C	D
1684	W_1684	Dam
1685	W_1685	Dam
1686	R_1686	Progeny	C	D
1687	R_1687	Progeny	C	D
1688	R_1688	Progeny	C	D
1689	R_1689	Progeny	C	D
1690	R_1690	Progeny	C	D
1691	R_1691	Progeny	C	D
1692	R_1692	Progeny	C	D
1693	R_1693	Progeny	C	D
1694	R_1694	Dam
1695	R_1695	Dam
1696	R_1696	Dam
1697	R_1697	Dam
1698	R_1698	Dam
1699	R_1699	Dam
1700	R_1700	Dam
1701	R_1701	Dam
1702	R_1702	Dam
1703	W_1703	Progeny	A	B
1704	W_1704	Progeny	A	B
1705	W_1705	Progeny	A	B
1706	W_1706	Progeny	A	B
1707	W_1707	Progeny	A	B
1708	W_1708	Progeny	A	B
1709	W_1709	Progeny	A	B
1710	R_1710	Dam
1711	R_1711	Dam
1712	R_1712	Dam
1713	W_1713	Dam
1714	W_1714	Dam
1715	W_1715	Dam
1716	W_1716	Dam
1717	W_1717	Dam
1718	W_1718	Dam
1719	W_1719	Dam
1720	W_1720	Dam
1721	R_1721	Dam
1722	W_1722	Dam
1723	R_1723	Dam
1724	R_1724	Dam
1725	R_1725	Dam
1726	W_1726	Dam
1727	R_1727	Dam
1728	R_1728	Dam
1729	R_1729	Dam
1730	R_1730	Dam
1731	W_1731	Progeny	A	B
1732	W_1732	Progeny	A	B
1733	W_1733	Progeny	A	B
1734	W_1734	Progeny	A	B
1735	W_1735	Progeny	A	B
1736	W_1736	Progeny	A	B
1737	W_1737	Progeny	A	B
1738	W_1738	Progeny	A	B
1739	W_1739	Progeny	A	B
1740	W_1740	Progeny	A	B
1741	R_1741	Dam
1742	R_1742	Dam
1743	R_1743	Dam
1744	R_1744	Dam
1745	R_1745	Dam
1746	W_1746	Dam
1747	W_1747	Dam
1748	R_1748	Dam
1749	W_1749	Dam
1750	R_1750	Dam
1751	R_1751	Dam
1752	R_1752	Dam
1753	R_1753	Dam
1754	R_1754	Dam
1755	R_1755	Dam
1756	R_1756	Dam
1757	R_1757	Dam
1758	R_1758	Dam
1759	R_1759	Dam
1760	R_1760	Dam
1761	R_1761	Dam
1762	R_1762	Dam
1763	R_1763	Dam
1764	R_1764	Dam
1765	R_1765	Dam
1766	R_1766	Dam
1767	R_1767	Dam
1768	R_1768	Progeny	C	D
1769	R_1769	Progeny	C	D
1770	R_1770	Progeny	C	D
1771	R_1771	Progeny	C	D
1772	R_1772	Progeny	C	D
1773	R_1773	Progeny	C	D
1774	R_1774	Progeny	C	D
1775	R_1775	Progeny	C	D
1776	R_1776	Progeny	C	D
1777	R_1777	Progeny	C	D
1778	W_1778	Dam
1779	W_1779	Dam
1780	W_1780	Dam
1781	W_1781	Dam
1782	W_1782	Dam
1783	W_1783	Dam
1784	W_1784	Dam
1785	W_1785	Dam
1786	W_1786	Dam
1787	W_1787	Dam
1788	W_1788	Dam
1789	R_1789	Progeny	C	D
1790	R_1790	Progeny	C	D
1791	R_1791	Progeny	C	D
1792	R_1792	Progeny	C	D
1793	R_1793	Progeny	C	D
1794	R_1794	Progeny	C	D
1795	R_1795	Progeny	C	D
1796	R_1796	Progeny	C	D
1797	R_1797	Progeny	C	D
1798	R_1798	Progeny	C	D
1799	R_1799	Progeny	C	D
1800	R_1800	Dam
1801	R_1801	Dam
1802	W_1802	Dam
1803	R_1803	Progeny	C	D
1804	R_1804	Progeny	C	D
1805	W_1805	Dam
1806	W_1806	Dam
1807	W_1807	Dam
1808	R_1808	Progeny	C	D
1809	R_1809	Progeny	C	D
1810	R_1810	Progeny	C	D
1811	R_1811	Progeny	C	D
1812	R_1812	Progeny	C	D
1813	R_1813	Progeny	C	D
1814	R_1814	Progeny	C	D
1815	R_1815	Dam
1816	R_1816	Dam
1817	R_1817	Dam
1818	R_1818	Dam
1819	R_1819	Dam
1820	R_1820	Dam
1821	R_1821	Dam
1822	R_1822	Dam
1823	R_1823	Dam
1824	R_1824	Dam
1825	R_1825	Dam
1826	R_1826	Dam
1827	W_1827	Progeny	A	B
1828	W_1828	Progeny	A	B
1829	R_1829	Dam
1830	W_1830	Progeny	A	B
1831	W_1831	Progeny	A	B
1832	W_1832	Progeny	A	B
1833	W_1833	Progeny	A	B
1834	W_1834	Progeny	A	B
1835	W_1835	Progeny	A	B
1836	W_1836	Progeny	A	B
1837	W_1837	Progeny	A	B
1838	R_1838	Dam
1839	R_1839	Dam
1840	R_1840	Dam
1841	R_1841	Dam
1842	R_1842	Dam
1843	R_1843	Dam
1844	R_1844	Dam
1845	R_1845	Dam
1846	R_1846	Dam
1847	R_1847	Dam
1848	W_1848	Dam
1849	R_1849	Dam
1850	R_1850	Dam
1851	W_1851	Dam
1852	W_1852	Progeny	A	B
1853	R_1853	Dam
1854	W_1854	Progeny	A	B
1855	W_1855	Progeny	A	B
1856	W_1856	Progeny	A	B
1857	W_1857	Progeny	A	B
1858	W_1858	Progeny	A	B
1859	W_1859	Progeny	A	B
1860	W_1860	Progeny	A	B
1861	W_1861	Progeny	A	B
1862	R_1862	Dam
1863	R_1863	Dam
1864	R_1864	Dam
1865	R_1865	Dam
1866	R_1866	Dam
1867	R_1867	Dam
1868	R_1868	Dam
1869	R_1869	Dam
1870	R_1870	Dam
1871	R_1871	Dam
1872	R_1872	Dam
1873	R_1873	Dam
1874	R_1874	Progeny	C	D
1875	R_1875	Dam
1876	W_1876	Dam
1877	W_1877	Dam
1878	W_1878	Dam
1879	W_1879	Dam
1880	R_1880	Dam
1881	R_1881	Dam
1882	R_1882	Dam
1883	R_1883	Dam
1884	R_1884	Dam
1885	R_1885	Dam
1886	R_1886	Dam
1887	R_1887	Dam
1888	R_1888	Dam
1889	R_1889	Dam
1890	W_1890	Dam
1891	R_1891	Progeny	C	D
1892	R_1892	Progeny	C	D
1893	R_1893	Progeny	C	D
1894	R_1894	Progeny	C	D
1895	R_1895	Progeny	C	D
1896	R_1896	Progeny	C	D
1897	R_1897	Progeny	C	D
1898	R_1898	Progeny	C	D
1899	W_1899	Dam
1900	R_1900	Progeny	C	D
1901	R_1901	Progeny	C	D
1902	W_1902	Dam
1903	W_1903	Dam
1904	R_1904	Dam
1905	R_1905	Progeny	C	D
1906	R_1906	Progeny	C	D
1907	R_1907	Progeny	C	D
1908	R_1908	Progeny	C	D
1909	R_1909	Progeny	C	D
1910	R_1910	Progeny	C	D
1911	R_1911	Progeny	C	D
1912	R_1912	Progeny	C	D
1913	R_1913	Progeny	C	D
1914	R_1914	Progeny	C	D
1915	R_1915	Progeny	C	D
1916	R_1916	Dam
1917	R_1917	Progeny	C	D
1918	R_1918	Dam
1919	R_1919	Progeny	C	D
1920	W_1920	Dam
1921	R_1921	Dam
1922	R_1922	Progeny	C	D
1923	R_1923	Dam
1924	R_1924	Progeny	C	D
1925	R_1925	Dam
1926	R_1926	Progeny	C	D
1927	R_1927	Dam
1928	R_1928	Dam
1929	R_1929	Progeny	C	D
1930	R_1930	Progeny	C	D
1931	R_1931	Progeny	C	D
1932	R_1932	Progeny	C	D
1933	R_1933	Progeny	C	D
1934	R_1934	Progeny	C	D
1935	R_1935	Progeny	C	D
1936	R_1936	Progeny	C	D
1937	R_1937	Progeny	C	D
1938	R_1938	Progeny	C	D
1939	R_1939	Dam
1940	R_1940	Progeny	C	D
1941	R_1941	Progeny	C	D
1942	R_1942	Progeny	C	D
1943	R_1943	Progeny	C	D
1944	R_1944	Progeny	C	D
1945	R_1945	Progeny	C	D
1946	R_1946	Progeny	C	D
1947	R_1947	Progeny	C	D
1948	R_1948	Progeny	C	D
1949	R_1949	Progeny	C	D
1950	R_1950	Dam
1951	R_1951	Dam
1952	W_1952	Dam
1953	W_1953	Dam
1954	W_1954	Dam
1955	W_1955	Dam
1956	W_1956	Dam
1957	W_1957	Dam
1958	W_1958	Dam
1959	W_1959	Dam
1960	W_1960	Dam
1961	R_1961	Dam
1962	R_1962	Dam
1963	R_1963	Dam
1964	R_1964	Progeny	C	D
1965	R_1965	Progeny	C	D
1966	R_1966	Progeny	C	D
1967	R_1967	Progeny	C	D
1968	R_1968	Progeny	C	D
1969	R_1969	Progeny	C	D
1970	R_1970	Progeny	C	D
1971	W_1971	Dam
1972	R_1972	Progeny	C	D
1973	R_1973	Progeny	C	D
1974	R_1974	Dam
1975	R_1975	Progeny	C	D
1976	R_1976	Progeny	C	D
1977	R_1977	Progeny	C	D
1978	R_1978	Progeny	C	D
1979	R_1979	Progeny	C	D
1980	R_1980	Progeny	C	D
1981	R_1981	Progeny	C	D
1982	R_1982	Progeny	C	D
1983	R_1983	Progeny	C	D
1984	R_1984	Progeny	C	D
1985	R_1985	Dam
1986	W_1986	Dam
1987	W_1987	Dam
1988	W_1988	Dam
1989	W_1989	Dam
1990	W_1990	Dam
1991	W_1991	Dam
1992	W_1992	Dam
1993	W_1993	Dam
1994	W_1994	Dam
